# Supplementary material for: Variations in Physiology and Multiple Bioactive Constituents under Salt Stress Provide Insight into the Quality Evaluation of Apocyni Veneti Folium
Source: PubMed Central journal article supplement (PMC6213253; doi:10.3390/ijms19103042), 2018-10-05
Supplement: ijms-19-03042-s001.pdf [file ijms-19-03042-s001.pdf]

## Supplementary Materials

# Variations in Physiology and Multiple Bioactive Constituents under Salt Stress Provide Insight into the Quality Evaluation of *Apocyni Veneti Folium*

Cuihua Chen <sup>1</sup>, Chengcheng Wang <sup>1</sup>, Zixiu Liu <sup>1</sup>, Xunhong Liu <sup>1,2,3,\*</sup>, Lisi Zou <sup>1</sup>, Jingjing Shi <sup>1</sup>, Shuyu Chen <sup>1</sup>, Jiali Chen <sup>1</sup> and Mengxia Tan <sup>1</sup>

<sup>1</sup> College of pharmacy, Nanjing University of Chinese Medicine, Nanjing 210023, China; cuihuachen2013@163.com (C.C.); ccw199192@163.com (C.W.); liuzixiu3221@126.com (Z.L.); zlstcm@126.com (L.Z.); shijingjingquiet@163.com (J.S); 18305172513@163.com(S.C.); 18994986833@163.com (J.C.); 18816250751@163.com (M.T.)

<sup>2</sup> Collaborative Innovation Center of Chinese Medicinal Resources Industrialization, Nanjing 210023, China

<sup>3</sup> National and Local Collaborative Engineering Center of Chinese Medicinal Resources Industrialization and Formulae Innovative Medicine, Nanjing 210023, China

\* Correspondence: liuxunh1959@163.com; Tel./Fax: +86-25-8581-1524

**Figure S1** Morphological changes in AVF after the treatment of different concentrations of NaCl

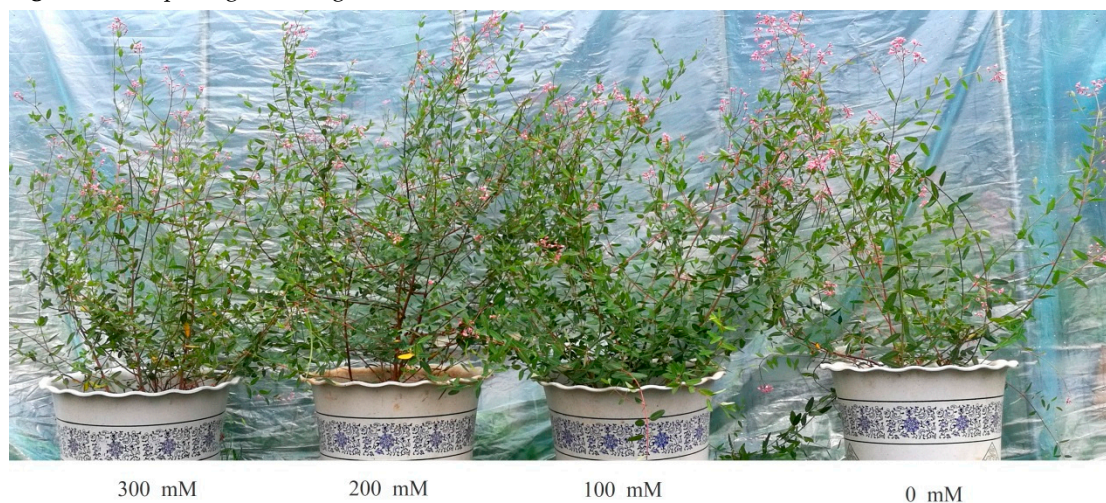

**Table S1** Physiological data of AVF under salt stress

| Physiological parameters                 | NaCl treatments |                 |                |                |
|------------------------------------------|-----------------|-----------------|----------------|----------------|
|                                          | 0 mM            | 100 mM          | 200 mM         | 300 mM         |
| soluble sugars(mg g <sup>-1</sup> FW)    | 54.55± 4.50d    | 95.08± 2.01b    | 205.17± 3.01a  | 79.35± 3.51c   |
| soluble proteins(mg mL <sup>-1</sup> FW) | 15.67± 0.06d    | 20.80± 0.26a    | 19.45±0.12b    | 17.07±0.15c    |
| Proline(µg g <sup>-1</sup> FW)           | 40.54± 1.50d    | 62.77± 5.02b    | 85.54± 2.50a   | 55.46± 2.50c   |
| MDA (nmol g <sup>-1</sup> FW)            | 74.42± 2.50d    | 81.33± 1.53c    | 85.83± 0.29b   | 91.21± 0.71a   |
| SOD(U g <sup>-1</sup> FW)                | 72.56±2.50 b    | 74.92± 5.05b    | 97.18± 4.01 a  | 100.18± 5.01a  |
| CAT (U mg <sup>-1</sup> prot)            | 1.60± 0.10 a    | 1.10± 0.10b     | 1.15± 0.07 b   | 1.25± 0.15b    |
| POD (U mg <sup>-1</sup> prot)            | 17.52± 2.50c    | 32.33± 0.70b    | 36.92±0.10a    | 38.66± 0.30a   |
| ascorbic acid (µg mL <sup>-1</sup> )     | 980.9±14.50 d   | 1095.00±12.12 a | 1050.00±4.00 b | 1029.67±3.51 c |

a, b, c and d Data are the mean ± SD (n = 3). Different letters following values in the same row indicate significant difference among salt treatments using Duncan's multiple-range test at p < 0.05.

**Figure S2** Representative extracted ion chromatograms of MRM chromatograms of the AVF under salt stress.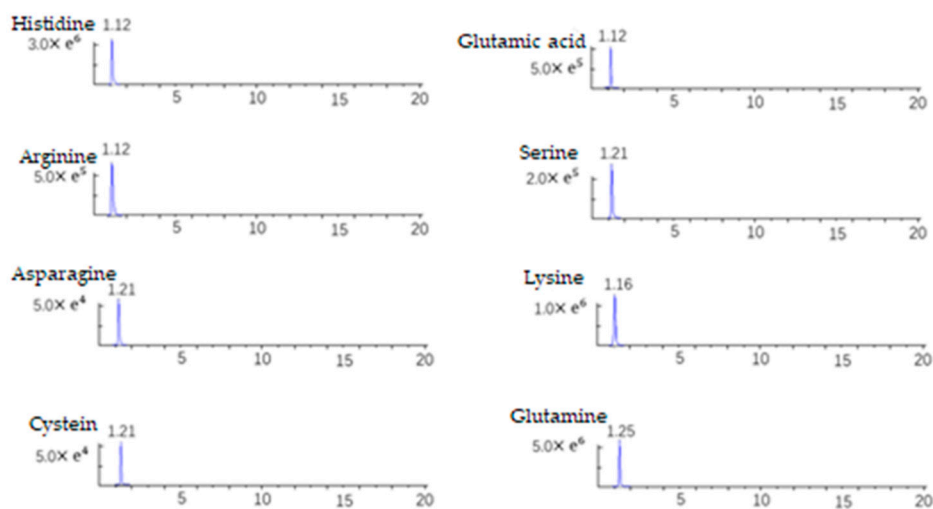

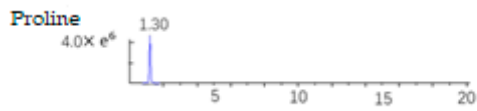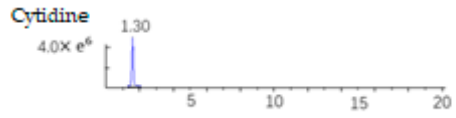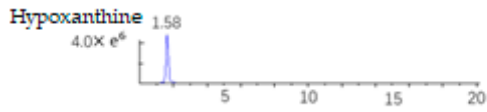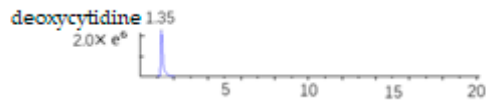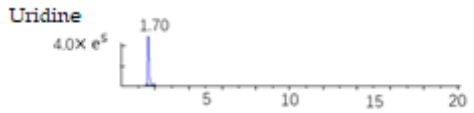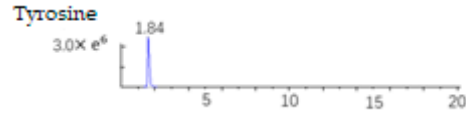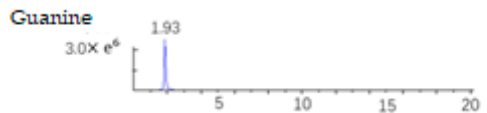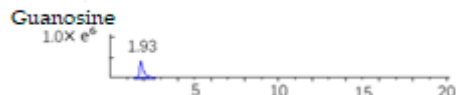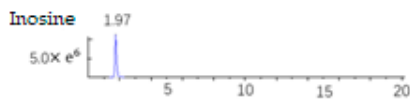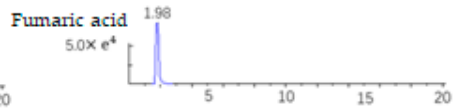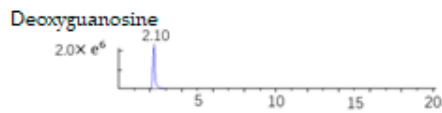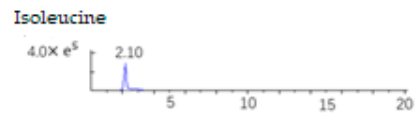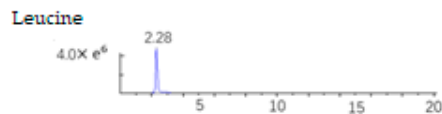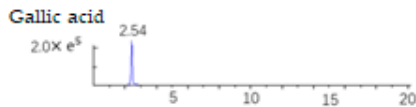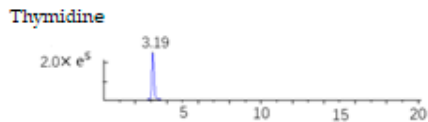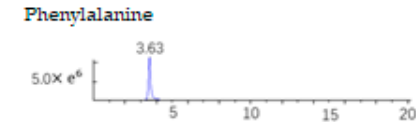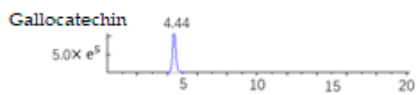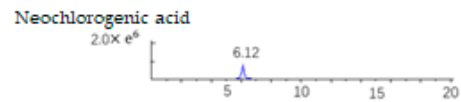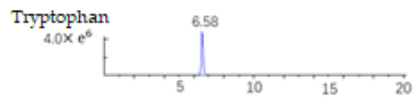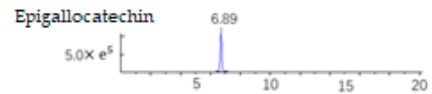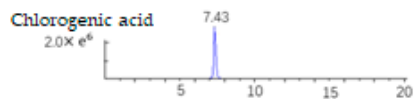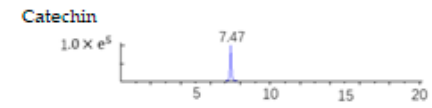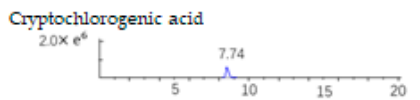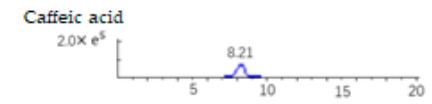

**Table S2** Parameters for multiple reaction monitoring (MRM) of the 43 target constituents.

| NO. | Constituents              | $t_R$<br>(min) | $m/z$                        | Precursor<br>ion | Product<br>ion | Fragmentor<br>voltage (V) | Collision<br>energy<br>(eV) |
|-----|---------------------------|----------------|------------------------------|------------------|----------------|---------------------------|-----------------------------|
| 1   | Histidine                 | 1.11           | 155[M + H] <sup>+</sup>      | 156.08           | 110.03         | 95                        | 16                          |
| 2   | Glutamic acid             | 1.12           | 147.13[M + H] <sup>+</sup>   | 147.08           | 83.92          | 83                        | 14                          |
| 3   | Arginine                  | 1.13           | 174.2[M + H] <sup>+</sup>    | 175.12           | 70.02          | 88                        | 18                          |
| 4   | Cysteine                  | 1.21           | 122.1529[M + H] <sup>+</sup> | 122.03           | 75.93          | 85                        | 17                          |
| 5   | Asparagine                | 1.22           | 133.1279[M + H] <sup>+</sup> | 133.06           | 73.87          | 65                        | 14                          |
| 6   | Serine                    | 1.23           | 105.09[M + H] <sup>+</sup>   | 106.05           | 59.99          | 67                        | 8                           |
| 7   | Lysine                    | 1.23           | 146.19[M + H] <sup>+</sup>   | 147.11           | 83.91          | 66                        | 14                          |
| 8   | Glutamine                 | 1.26           | 147.1579[M + H] <sup>+</sup> | 148.06           | 83.91          | 58                        | 14                          |
| 9   | Proline                   | 1.30           | 115.13[M + H] <sup>+</sup>   | 116.07           | 70.02          | 68                        | 10                          |
| 10  | Cytidine                  | 1.31           | 243.22[M + H] <sup>+</sup>   | 244.09           | 112.0          | 61                        | 10                          |
| 11  | Hypoxanthine              | 1.34           | 136.11[M + H] <sup>+</sup>   | 137.05           | 137.05         | 51                        | 24                          |
| 12  | deoxycytidine             | 1.39           | 227.3[M + H] <sup>+</sup>    | 228.2            | 112.05         | 76                        | 13                          |
| 13  | Uridine                   | 1.70           | 244.2[M + H] <sup>+</sup>    | 244.9            | 113.0          | 103                       | 13                          |
| 14  | Tyrosine                  | 1.84           | 182.1[M + H] <sup>+</sup>    | 182.16           | 136.08         | 46                        | 17                          |
| 15  | Guanine                   | 1.93           | 151.12[M + H] <sup>+</sup>   | 152.0            | 135.0          | 51                        | 25                          |
| 16  | Guanosine                 | 1.95           | 283.24[M + H] <sup>+</sup>   | 284.3            | 152.0          | 62                        | 15                          |
| 17  | Inosine                   | 1.97           | 268.23[M + H] <sup>+</sup>   | 269.0            | 137.07         | 46                        | 15                          |
| 18  | Fumaric acid              | 1.99           | 115.0621[M - H]              | 114.8            | 70.8           | -50                       | -10                         |
| 19  | deoxyguanosine            | 2.07           | 267.2[M + H] <sup>+</sup>    | 268.1            | 152.1          | 61                        | 15                          |
| 20  | Isoleucine                | 2.09           | 131.18[M + H] <sup>+</sup>   | 132.1            | 86.05          | 98                        | 10                          |
| 21  | Leucine                   | 2.28           | 131.18[M + H] <sup>+</sup>   | 132.1            | 86.05          | 98                        | 10                          |
| 22  | Gallic acid               | 2.54           | 169.1121[M - H] <sup>-</sup> | 168.9            | 125.0          | -120                      | -18                         |
| 23  | Thymidine                 | 3.17           | 242.23[M + H] <sup>+</sup>   | 243.1            | 127.07         | 61                        | 13                          |
| 24  | Phenylalanine             | 3.60           | 165.19[M + H] <sup>+</sup>   | 166.1            | 120.05         | 56                        | 14                          |
| 25  | Galocatechin              | 4.43           | 305.262[M - H] <sup>-</sup>  | 305.1            | 125.0          | -55                       | -25                         |
| 26  | Neochlorogenic acid       | 6.12           | 353.09[M - H] <sup>-</sup>   | 305.01           | 125.0          | -95                       | -20                         |
| 27  | Tryptophan                | 6.59           | 205.2379[M + H] <sup>+</sup> | 205.03           | 188.1          | 61                        | 13                          |
| 28  | Epigallocatechin          | 6.88           | 305.262[M - H] <sup>-</sup>  | 305.1            | 125.0          | -55                       | -25                         |
| 29  | Chlorogenic acid          | 7.43           | 353.09[M - H] <sup>-</sup>   | 305.01           | 125.0          | -95                       | -20                         |
| 30  | Catechin                  | 7.47           | 289.2621[M - H] <sup>-</sup> | 289.0            | 244.8          | -135                      | -20                         |
| 31  | Cryptochlorogenic acid    | 7.74           | 353.09[M - H] <sup>-</sup>   | 305.01           | 125.0          | -95                       | -20                         |
| 32  | Caffeic acid              | 8.19           | 179.1421[M - H] <sup>-</sup> | 178.97           | 134.6          | -125                      | -20                         |
| 33  | Epicatechin               | 8.54           | 289.2621[M - H] <sup>-</sup> | 289.0            | 244.8          | -135                      | -20                         |
| 34  | Rutin                     | 11.10          | 609.5[M - H] <sup>-</sup>    | 609.06           | 300.0          | -245                      | -46                         |
| 35  | Hyperoside                | 11.57          | 463.37[M - H] <sup>-</sup>   | 463.0            | 300.0          | -180                      | -36                         |
| 36  | Isoquercitrin             | 11.9           | 463.3721[M - H] <sup>-</sup> | 463.0            | 300.0          | -180                      | -36                         |
| 37  | Quercitrin                | 13.30          | 447.3681[M - H] <sup>-</sup> | 447.0            | 301.0          | -165                      | -30                         |
| 38  | Avicularin                | 13.30          | 435.3579[M + H] <sup>+</sup> | 435.0            | 303.0          | 51                        | 15                          |
| 39  | Kaempferol 3-O-rutinoside | 13.32          | 595.5279[M + H] <sup>+</sup> | 595.0            | 287.2          | 36                        | 25                          |
| 40  | Trifolin                  | 13.34          | 449.3239[M + H] <sup>+</sup> | 449.0            | 287.0          | 46                        | 21                          |
| 41  | Astragalin                | 14.26          | 447.36[M - H] <sup>-</sup>   | 447.1            | 283.9          | -100                      | -36                         |
| 42  | Amentoflavone             | 17.80          | 539.4579[M + H] <sup>+</sup> | 539.0            | 377.0          | 251                       | 57                          |
| 43  | Apigenin                  | 18.10          | 269.2321[M - H] <sup>-</sup> | 268.8            | 116.9          | -129                      | -40                         |

**Figure S3** Total ion chromatogram of AVF under salt stress

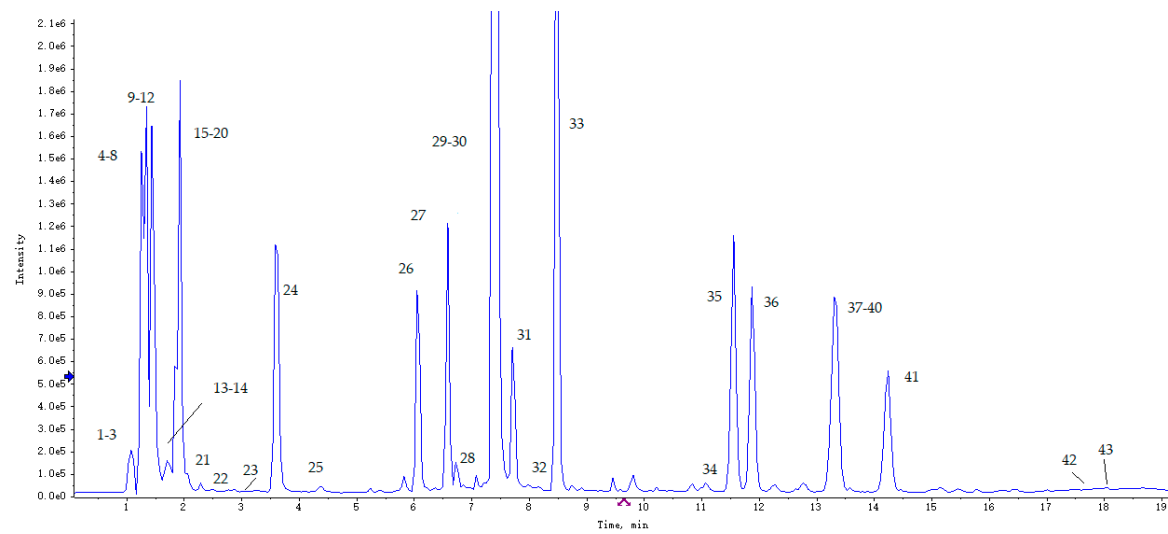

The order of 1-43 was the same as the number in Table S2.

**Table S3.** Regression equation, correlation coefficient, linear range, limit of detection (LODs), limit of quantitation (LOQs), precision, repeatability, stability, and recovery of investigated constituents.

| Analytes        | Concentrations<br>( $\mu\text{g mL}^{-1}$ ) | Calibration Curves | $r^2$  | Linear Range<br>$\text{ng mL}^{-1}$ | LOD  | LOQ   | Precision (%) |           | Repeatability (%<br>RSD, $n = 6$ ) | Stability (%<br>RSD, $n = 6$ ) | Recovery% |         |        |         |        |         |
|-----------------|---------------------------------------------|--------------------|--------|-------------------------------------|------|-------|---------------|-----------|------------------------------------|--------------------------------|-----------|---------|--------|---------|--------|---------|
|                 |                                             |                    |        |                                     |      |       | Intra-day     | Inter-day |                                    |                                | Low       |         | Medium |         | High   |         |
|                 |                                             |                    |        |                                     |      |       |               |           |                                    |                                | Mean      | RS<br>D | Mean   | RS<br>D | Mean   | RS<br>D |
| Histidine       | 38.1                                        | Y=546x-190000      | 0.9921 | 3.81 -38100                         | 1.91 | 6.37  | 1.48          | 2.47      | 1.37                               | 1.56                           | 98.9      | 1.37    | 95.69  | 0.98    | 99.43  | 4.39    |
| Glutamic acid   | 54.3                                        | Y=65.3x+42500      | 0.9974 | 2.72-54300                          | 2.72 | 9.07  | 1.02          | 2.89      | 1.6                                | 1.23                           | 96.4      | 1.76    | 96.87  | 4.02    | 100.53 | 4.26    |
| Arginine        | 18.52                                       | Y=1.31x-10300      | 0.9998 | 3.70 -4630                          | 3.7  | 12.33 | 1.43          | 2.32      | 1.07                               | 1.32                           | 97.03     | 3.84    | 103.91 | 3.47    | 96.09  | 2.12    |
| Cysteine        | 15.64                                       | Y=63x-4200         | 0.9962 | 3.128-15640                         | 3.13 | 10.43 | 2.51          | 2.97      | 2.0                                | 2.91                           | 99.05     | 4.87    | 97.91  | 2.30    | 102.34 | 2.11    |
| Asparagine      | 14.6                                        | Y=24.5x-2530       | 0.9997 | 2.92<br>-146000                     | 2.92 | 9.73  | 1.72          | 1.91      | 1.59                               | 2.31                           | 97.96     | 4.02    | 98.98  | 1.73    | 103.90 | 4.39    |
| Serine          | 19.84                                       | Y=71.8x-5850       | 0.9998 | 3.968<br>-19840                     | 3.96 | 13.2  | 1.21          | 2.43      | 1.32                               | 2.69                           | 98.8      | 3.00    | 98.92  | 3.23    | 103.75 | 1.82    |
| Lysine          | 19.72                                       | Y=402x-89100       | 0.9998 | 3.94-19720                          | 3.94 | 13.13 | 1.32          | 1.6       | 1.43                               | 1.2                            | 95.39     | 4.75    | 99.27  | 4.80    | 98.32  | 2.57    |
| Glutamine       | 18.2                                        | Y=1540x-27500<br>0 | 0.9988 | 3.64 -18200                         | 0.91 | 3.03  | 2.98          | 1.52      | 2.82                               | 2.45                           | 98.87     | 1.66    | 96.48  | 4.47    | 99.86  | 3.12    |
| Proline         | 19.2                                        | Y=699x-10900       | 0.9999 | 3.84-19200                          | 0.96 | 3.2   | 1.67          | 1.06      | 1.39                               | 2.15                           | 97.73     | 4.39    | 98.55  | 1.48    | 103.11 | 2.08    |
| Cytidine        | 30.7                                        | Y=1500x-31000<br>0 | 0.999  | 6.14 -15350                         | 1.54 | 5.13  | 2.41          | 2.93      | 2.13                               | 1.36                           | 100.1     | 3.33    | 97.82  | 1.85    | 98.46  | 2.02    |
| Hypoxanthine    | 9.4                                         | Y=10500x-4240<br>0 | 0.996  | 9.40 -9400                          | 1.88 | 6.27  | 2.12          | 1.49      | 1.1                                | 2.53                           | 97.05     | 3.45    | 99.75  | 4.82    | 102.31 | 3.25    |
| Dideoxycytidine | 21.0                                        | Y=1020x-13300      | 0.9986 | 4.20 -10500                         | 1.05 | 3.5   | 2.68          | 2.66      | 2.82                               | 2.74                           | 95.88     | 2.76    | 99.42  | 1.66    | 98.01  | 4.12    |

|                        |       |               |        |                 |      |       |      |      |      |      |        |      |        |      |        |      |
|------------------------|-------|---------------|--------|-----------------|------|-------|------|------|------|------|--------|------|--------|------|--------|------|
| Uridine                | 18.0  | Y=81.6x-5880  | 0.9997 | 3.6-18000       | 1.8  | 6     | 1.98 | 2.71 | 2.21 | 1.45 | 96.88  | 3.65 | 100.64 | 1.20 | 102.06 | 3.32 |
| Tyrosine               | 20.08 | Y=761x-21100  | 0.9999 | 4.02-20080      | 4.02 | 13.4  | 1.74 | 2.58 | 1.11 | 3.2  | 99.9   | 2.12 | 98.62  | 2.16 | 97.05  | 2.41 |
| Guanine                | 20.8  | Y=151x-56200  | 0.9973 | 4.16 -20800     | 4.16 | 13.87 | 1.29 | 2.02 | 1.34 | 2.89 | 100.08 | 1.11 | 100.29 | 2.88 | 103.86 | 1.16 |
| Guanosine              | 18.6  | Y=647x-57200  | 0.9991 | 3.72-18600      | 1.86 | 6.2   | 2.13 | 2.59 | 2.63 | 2.61 | 98.59  | 1.50 | 95.56  | 4.90 | 99.62  | 1.57 |
| Inosine                | 16.6  | Y=7510x-39500 | 0.999  | 3.32-16600      | 1.66 | 5.53  | 2.68 | 1.96 | 2.25 | 2.23 | 99.84  | 1.61 | 96.95  | 3.11 | 97.41  | 1.87 |
| Fumaric acid           | 3.8   | Y=19.4x+16100 | 0.9991 | 7.6-3800        | 3.8  | 12.67 | 2.36 | 1.89 | 1.59 | 2.14 | 96.05  | 2.83 | 102.37 | 2.28 | 97.32  | 1.71 |
| Dideoxyguanosine       | 13.44 | Y=1120x-94300 | 0.9994 | 2.69-13440      | 2.69 | 8.97  | 1.77 | 2.53 | 2.62 | 3.01 | 99.32  | 4.27 | 98.32  | 4.09 | 98.13  | 4.90 |
| Isoleucine             | 15.0  | Y=150x+366    | 0.9994 | 15.00<br>-15000 | 3    | 10    | 3.05 | 1.59 | 1.85 | 3.54 | 101.0  | 1.87 | 98.51  | 2.68 | 97.49  | 1.66 |
| Leucine                | 41.6  | Y=53.9x+366   | 0.9998 | 8.32 -20800     | 2.08 | 6.93  | 1.87 | 1.49 | 2.76 | 2.88 | 100.86 | 3.44 | 97.8   | 2.77 | 103.71 | 4.41 |
| Gallic acid            | 21.08 | Y=57.3x-31500 | 0.9996 | 4.22 -10540     | 4.22 | 14.07 | 2.99 | 2.91 | 1.58 | 2.76 | 99.52  | 4.03 | 103.58 | 4.30 | 97.28  | 3.84 |
| Thymidine              | 8.8   | Y=160x-9940   | 0.9996 | 8.80 -8800      | 1.76 | 5.87  | 1.58 | 2.51 | 2.07 | 1.72 | 99.21  | 3.45 | 103.78 | 2.96 | 103.08 | 4.68 |
| Phenylalanine          | 40.48 | Y=3650x+22800 | 0.9999 | 8.10<br>-404800 | 2.02 | 6.73  | 1.47 | 2.85 | 2.95 | 1.35 | 98.31  | 2.33 | 100.68 | 2.61 | 95.80  | 1.04 |
| Gallocatechin          | 20.48 | Y=121x-110000 | 0.9992 | 4.10 -20480     | 4.1  | 13.67 | 1.15 | 2.11 | 1.37 | 1.91 | 100.76 | 4.18 | 95.56  | 3.51 | 99.95  | 4.93 |
| Neochlorogenic acid    | 22.48 | Y=69.1x-18200 | 0.9997 | 4.50 -22480     | 4.5  | 15    | 2.87 | 2.99 | 1.69 | 2.73 | 97.43  | 3.69 | 103.61 | 2.67 | 97.26  | 4.32 |
| Tryptophan             | 13.0  | Y=3310x+13500 | 0.9999 | 2.60 -6500      | 2.6  | 8.67  | 3.1  | 2.67 | 1.64 | 1.85 | 95.7   | 1.57 | 99.45  | 4.25 | 103.76 | 1.77 |
| Epigallocatechin       | 22.04 | Y=57.2x-24200 | 0.9999 | 22.04<br>-22040 | 1.1  | 3.67  | 1.35 | 1.41 | 2.38 | 1.91 | 103.4  | 3.86 | 103.10 | 4.25 | 96.97  | 1.87 |
| Chlorogenic acid       | 61.52 | Y=871x-121000 | 0.9999 | 6.15 -30760     | 6.15 | 20.5  | 2.28 | 3.25 | 1.66 | 1.33 | 98.66  | 2.97 | 103.62 | 1.64 | 96.84  | 3.42 |
| Catechin               | 19.64 | Y=13.7x-4980  | 0.9998 | 3.93 -19640     | 3.93 | 13.1  | 2.65 | 1.56 | 2.96 | 2.09 | 99.45  | 4.70 | 95.44  | 2.98 | 103.55 | 4.50 |
| Cryptochlorogenic acid | 21.6  | Y=190x-44100  | 0.9994 | 4.32 -21600     | 4.32 | 14.4  | 3.3  | 2.34 | 2.54 | 1.52 | 95.29  | 4.10 | 100.53 | 1.13 | 100.10 | 1.80 |

|                                |       |                    |        |                 |      |       |      |      |      |      |        |      |        |      |        |      |
|--------------------------------|-------|--------------------|--------|-----------------|------|-------|------|------|------|------|--------|------|--------|------|--------|------|
| Caffeic acid                   | 18.44 | Y=214x-102000      | 0.9922 | 3.69 -9220      | 3.69 | 12.3  | 2.54 | 1.79 | 2.21 | 1.32 | 97.65  | 1.73 | 97.48  | 2.45 | 95.30  | 2.58 |
| Epicatechin                    | 22.84 | Y=368x-23900       | 0.9997 | 4.57<br>-228400 | 4.57 | 15.23 | 2.82 | 1.72 | 1.75 | 1.14 | 102.01 | 2.14 | 95.36  | 4.29 | 101.01 | 2.51 |
| Rutin                          | 20.2  | Y=217x+4440        | 0.9999 | 4.04 -20200     | 1.01 | 3.37  | 1.56 | 2.18 | 1.67 | 2.41 | 101.86 | 1.79 | 97.59  | 4.30 | 95.19  | 1.83 |
| Hyperoside                     | 20.0  | Y=197x+64100       | 0.9997 | 4.0-20000       | 4    | 13.33 | 1.25 | 1.64 | 2.9  | 2.79 | 99.94  | 2.62 | 100.77 | 3.83 | 100.70 | 2.91 |
| Isoquercitrin                  | 21.22 | Y=226x+48000       | 0.9999 | 4.24 -21220     | 4.24 | 14.13 | 2.06 | 1.08 | 2.31 | 1.13 | 103.86 | 1.94 | 95.81  | 1.67 | 99.66  | 2.19 |
| Quercitrin                     | 18.66 | Y=210x-99000       | 0.9999 | 18.66<br>-18660 | 3.73 | 12.43 | 1.59 | 1.51 | 1.52 | 1.28 | 99.45  | 4.60 | 102.56 | 4.10 | 98.21  | 1.85 |
| Avicularin                     | 19.26 | Y=1920x-31900<br>0 | 0.9992 | 3.85-9630       | 3.85 | 12.83 | 2.14 | 1.84 | 1.29 | 2.32 | 96.99  | 3.55 | 97.51  | 2.80 | 96.51  | 3.87 |
| Kaempferol 3-<br>O- rutinoside | 19.84 | Y=361x-1150        | 0.9997 | 19.84-19840     | 3.97 | 13.23 | 1.92 | 2.37 | 1.89 | 1.68 | 96.22  | 2.51 | 100.14 | 1.91 | 98.61  | 2.57 |
| Trifolin                       | 12.04 | Y=509x+68000       | 0.9999 | 12.04<br>-12040 | 2.41 | 8.03  | 0.87 | 2.58 | 2.67 | 2.99 | 95.89  | 4.89 | 103.40 | 4.24 | 96.44  | 3.60 |
| Astragalin                     | 23.58 | Y=225x+56400<br>0  | 0.9991 | 4.72 -23580     | 4.72 | 15.73 | 2.23 | 2.85 | 1.85 | 2.25 | 99.00  | 4.98 | 98.26  | 2.80 | 102.81 | 1.27 |
| Amentoflavone                  | 20.22 | Y=0.147x-4.85      | 0.9979 | 4.04 -10110     | 4.04 | 13.47 | 1.17 | 2.39 | 1.94 | 1.47 | 102.39 | 2.73 | 103.36 | 4.87 | 95.92  | 4.24 |
| Apigenin                       | 19.62 | Y=0.473x+210       | 0.9921 | 3.92-19620      | 3.92 | 13.07 | 1.84 | 1.63 | 2.36 | 2.29 | 101.18 | 4.79 | 99.12  | 3.75 | 103.75 | 4.85 |



**Table S4.** Contents of 43 constituents in the AVF under salt stress

| Treatments | Contents ( $\mu\text{g g}^{-1}$ , $n=3$ ) |               |               |             |               |              |               |              |             |             |
|------------|-------------------------------------------|---------------|---------------|-------------|---------------|--------------|---------------|--------------|-------------|-------------|
|            | Histidine                                 | Glutamic acid | Arginine      | Cysteine    | Asparagine    | Serine       | Lysine        | Glutamine    | Proline     | Cytidine    |
| 0 mM       | 19.16±0.50a                               | 76.02±2.00d   | 98.14±6.86ab  | 4.12±0.44c  | 706.38±0.71b  | 96.31±3.81a  | 104.98±17.02a | 196.96±5.79b | 44.69±1.94d | 20.65±1.12b |
| 100 mM     | 19.18±0.71a                               | 100.10±9.17c  | 106.49±12.59a | 4.62±0.00bc | 716.05±1.09ab | 101.29±0.75a | 107.95±3.95a  | 207.57±2.40a | 67.65±3.22b | 28.77±0.95a |
| 200 mM     | 18.90±0.08a                               | 160.01±10.00a | 90.23±5.55ab  | 5.12±0.51b  | 718.93±4.11a  | 89.56±0.87b  | 123.25±8.09a  | 176.95±2.70c | 84.40±0.65a | 26.28±1.03a |
| 300 mM     | 18.89±0.08a                               | 130.02±20.00b | 81.04±3.1b    | 6.18±0.50a  | 713.23±8.07ab | 73.03±3.79c  | 84.04±4.09b   | 144.73±7.36d | 55.12±4.48c | 29.15±2.81a |

| Treatments | Hypoxanthine | Dideoxycytidine | Uridine      | Tyrosine       | Guanine      | Guanosine   | Inosine      | Fumaric acid  | Dideoxyguanosine | Isoleucine   | Leucine        |
|------------|--------------|-----------------|--------------|----------------|--------------|-------------|--------------|---------------|------------------|--------------|----------------|
| 0 mM       | 0.991±0.03b  | 0.805±0.10a     | 10.531±0.57c | 114.971±8.28a  | 12.000±2.00c | 3.589±0.28c | 22.828±1.17a | 30.667±10.41a | 4.679±0.08b      | 36.338±1.66a | 121.416±6.35a  |
| 100 mM     | 3.450±0.30a  | 0.886±0.07a     | 13.411±0.57a | 126.943±15.15a | 15.865±0.81b | 5.348±0.35a | 12.728±1.20c | 37.000±4.36a  | 4.790±0.04b      | 45.964±5.09a | 127.495±12.27a |
| 200 mM     | 2.283±1.25a  | 0.909±0.07a     | 11.991±0.40b | 115.075±8.17a  | 21.078±0.71a | 5.287±0.10a | 16.327±1.49b | 50.304±26.70a | 4.957±0.02a      | 48.382±3.93a | 133.923±5.38a  |
| 300 mM     | 2.818±0.08a  | 0.894±0.10a     | 9.137±0.70d  | 78.122±55.31a  | 23.308±1.48a | 4.502±0.24b | 10.972±0.88c | 46.000±3.46a  | 5.035±0.11a      | 51.246±8.50a | 136.082±6.45a  |

| Treatments | Gallic acid | Thymidine   | Phenylalanine | Gallocatechin | Neochlorogenic acid | Tryptophan   | Epigallocatechin | Chlorogenic acid | Catechin    | Cryptochlorogenic acid | Caffeic acid |
|------------|-------------|-------------|---------------|---------------|---------------------|--------------|------------------|------------------|-------------|------------------------|--------------|
| 0 mM       | 30.10±2.01a | 25.54±1.45a | 78.82±3.44b   | 225.80±2.07d  | 8626.80±231.07a     | 206.36±1.21c | 326.63±3.77d     | 892.30±4.39a     | 57.00±1.00b | 741.46±88.38a          | 159.07±7.07b |
| 100 mM     | 35.01±3.21a | 16.78±0.69b | 84.129±2.09b  | 305.31±5.16c  | 7275.88±107.87b     | 209.60±1.38c | 493.15±10.70c    | 785.90±44.32b    | 59.70±4.52b | 636.38±31.75a          | 145.17±6.12c |
| 200 mM     | 50.02±7.78a | 14.05±0.67c | 82.22±6.05b   | 472.61±8.83a  | 6862.01±426.96b     | 222.53±1.96b | 617.46±3.30a     | 911.86±11.41a    | 77.94±1.89a | 814.87±19.62a          | 176.30±5.77a |
| 300 mM     | 40.03±9.17a | 5.96±0.13d  | 95.54±6.87a   | 320.55±5.90b  | 6439.41±80.23c      | 242.36±2.24a | 520.89±22.62b    | 868.72±22.03a    | 59.69±0.56b | 827.02±111.65a         | 186.67±5.74a |

| Treatments | Epicatechin   | Rutin        | Hyperoside      | Isoquercitrin   | Quercitrin  | Avicularin  | Kaempferol 3-O-rutinoside | Trifolin      | Astragalin    | Amentoflavone | Apigenin      |
|------------|---------------|--------------|-----------------|-----------------|-------------|-------------|---------------------------|---------------|---------------|---------------|---------------|
| 0 mM       | 139.27±9.83c  | 52.81±13.07a | 2150.67±350.44b | 3109.43±164.10b | 25.53±0.59a | 15.33±0.51b | 38.72±0.91d               | 312.67±35.48a | 360.51±20.93a | 299.90±0.02a  | 466.97±31.14a |
| 100 mM     | 271.53±27.13b | 54.21±8.50a  | 2580.05±127.24b | 3581.24±133.45a | 25.85±0.13a | 20.82±1.61a | 83.48±6.46c               | 366.58±22.11a | 398.42±11.53a | 318.18±18.29a | 515.28±45.49a |
| 200 mM     | 319.93±6.97a  | 74.05±5.49a  | 2996.03±66.02a  | 3225.90±34.83b  | 25.50±0.23a | 19.37±2.28a | 141.93±2.02b              | 333.97±29.45a | 346.07±17.83b | 322.63±12.78a | 511.06±81.93a |
| 300 mM     | 287.63±15.60b | 61.85±0.59a  | 1790.79±125.47c | 2835.59±86.73c  | 25.75±0.14a | 13.12±1.16b | 169.91±21.99a             | 261.16±26.19b | 289.63±29.26c | 306.01±10.58a | 496.05±25.14a |

The four groups were the same as in Figure 2. Data are the mean ± SD (n = 3). Different letters following values in the same column indicate significant difference among salt treatments using Duncan's multiple-range test at p < 0.05

**Figure S4** Chemical structures of 43 compounds analyzed in this study

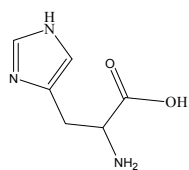

1. Histidine

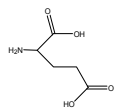

2. Glutamic acid

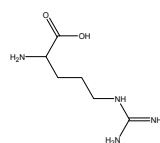

3. Arginine

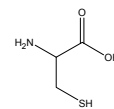

4. Cysteine

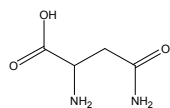

5. Asparagine

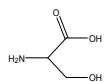

6. Serine

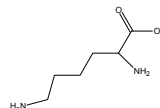

7. Lysine

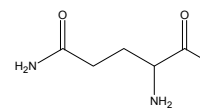

8. Glutamine

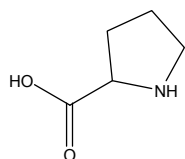

9. Proline

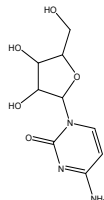

10. Cytidine

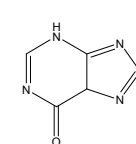

11. Hypoxanthine

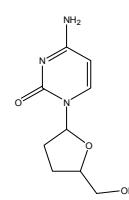

12. dideoxycytidine

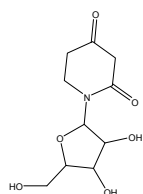

13. Uridine

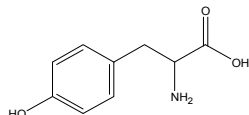

14. Tyrosine

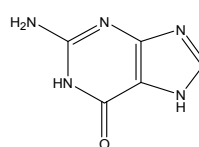

15. Guanine

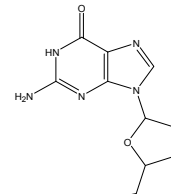

16. Guanosine

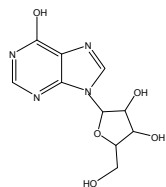

17. Inosine

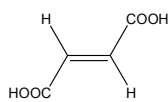

18. Fumaric acid

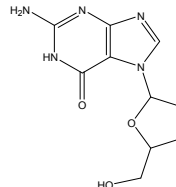

19. dideoxyguanosine

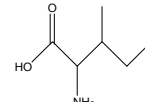

20. Isoleucine

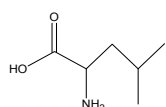

21. Leucine

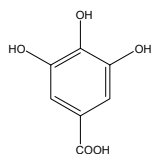

22 Gallic acid

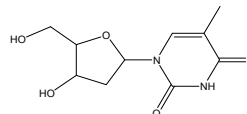

23. Thymidine

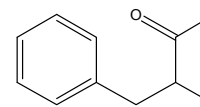

24. Phenylalanine

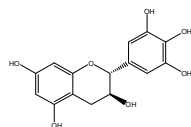

25. Gallocatechin

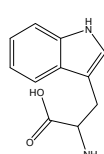

27. Tryptophan

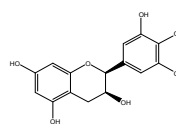

28. Epigallocatechin

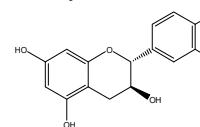

30. Catechin

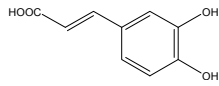

32. Caffeic acid

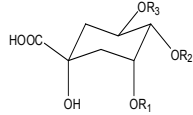

26. Neochlorogenic acid:  $R_1=R_2=H, R_3=$ caffeoyl

29. Chlorogenic acid:  $R_1=$ caffeoyl,  $R_2=R_3=H$

31. Cryptochlorogenic acid:  $R_1=R_3=H, R_2=$ caffeoyl

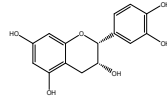

33. Epicatechin

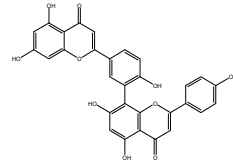

42. Amentoflavone

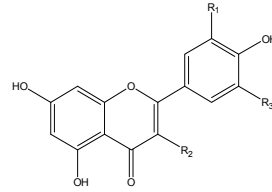

34. Rutin:  $R_1=OH, R_2=O$ -rutinose,  $R_3=H$

35. Hyperoside:  $R_1=OH, R_2=O$ -galactose,  $R_3=H$

36. Isoquercetin:  $R_1=OH, R_2=O$ -glucose,  $R_3=H$

37. Quercitrin:  $R_1=H, R_2=O$ -arabinose,  $R_3=OH$

38. Avicularin:  $R_1=OH, R_2=O$ -arabinose,  $R_3=H$

39. Kaempferol 3-O-rutinoside:  $R_1=H,$

$R_2=O$ -galactose,  $R_3=H$

40. Trifolin:  $R_1=H, R_2=O$ -galactose,  $R_3=H$

41. Astragalin:  $R_1=H, R_2=O$ -glucose,  $R_3=H$

43. Apigenin:  $R_1=H, R_2=H, R_3=H$
